# Supplementary material
Source: PubMed Central journal article supplement (PMC2938109)
Supplement: supp_M110.000422_mcp.M110.000422-1.pdf [file supp_M110.000422_mcp.M110.000422-1.pdf]

Score for Each Ion Matched in ETD Spectra When Using Protein Prospector  
versions 5.3 and 5.4

*Protein Prospector v5.3*

|     |     |
|-----|-----|
| b   | 0.3 |
| c   | 2.1 |
| c-1 | 0.3 |
| y   | 1.2 |
| z   | 3.2 |
| z+1 | 1.9 |

*Protein Prospector v5.4*

PRECURSOR CHARGE: 2+

Basic residue at N-terminus and C-terminus

|     |     |
|-----|-----|
| b   | 0.0 |
| c   | 3.0 |
| c-1 | 1.3 |
| y   | 0.6 |
| z   | 2.6 |
| z+1 | 1.7 |

Basic residue at N-terminus

|     |     |
|-----|-----|
| b   | 0.7 |
| c   | 4.7 |
| c-1 | 1.6 |
| y   | 0.5 |
| z   | 1.6 |
| z+1 | 0.7 |

Basic residue at C-terminus

|     |     |
|-----|-----|
| b   | 0.0 |
| c   | 1.1 |
| c-1 | 0.9 |
| y   | 1.2 |
| z   | 3.1 |

z+1 3.1

No basic residue at either terminus

b 0.0

c 4.0

c-1 2.3

y 0.6

z 2.6

z+1 1.7

PRECURSOR CHARGE: 3+

Basic residue at N-terminus and C-terminus

c 2.9  
c 2+ 0.66  
y 0.5  
z 2.0  
z+1 1.7  
z 2+ 0.0  
z+1 2+ 0.0

Basic residue at N-terminus

c 3.5  
c 2+ 1.28  
y 0.5  
z 2.3  
z+1 1.3  
z 2+ 0.0  
z+1 2+ 0.0

Basic residue at C-terminus

c 2.9  
c 2+ 0.0  
y 0.9  
z 2.7  
z+1 1.9  
z 2+ 0.86  
z+1 2+ 0.57

No basic Residue at either terminus

c 2.9  
c 2+ 0.89  
y 0.5  
z 2.0  
z+1 1.7  
z 2+ 0.79  
z+1 2+ 0.52

PRECURSOR CHARGE: 4+

Basic residue at N-terminus and C-terminus

c 2.9  
c 2+ 2.02  
y 0.5  
z 2.0  
z+1 1.7  
z 2+ 1.16  
z+1 2+ 0.93

Basic residue at N-terminus

c 3.5  
c 2+ 1.62  
y 0.5  
z 2.3  
z+1 1.3  
z 2+ 1.25  
z+1 2+ 1.02

Basic residue at C-terminus

c 2.9  
c 2+ 1.65  
y 0.9  
z 2.7  
z+1 1.9  
z 2+ 1.12  
z+1 2+ 1.25

No basic residue at either terminus

c 2.9  
c 2+ 1.6  
y 0.5  
z 2.0  
z+1 1.7  
z 2+ 0.9  
z+1 2+ 1.0

PRECURSOR CHARGE: 5+

Basic residue at N-terminus and C-terminus

c 2.9  
c 2+ 1.99  
y 0.5  
z 2.0  
z+1 1.7  
z 2+ 0.58  
z+1 2+ 1.54

Basic residue at N-terminus

c 3.5  
c 2+ 1.49  
y 0.5  
z 2.3  
z+1 1.3  
z 2+ 0.79  
z+1 2+ 1.65

Basic residue at C-terminus

c 2.9  
c 2+ 1.68  
y 0.9  
z 2.7  
z+1 1.9  
z 2+ 0.57  
z+1 2+ 1.6

No basic residue at either terminus

c 2.9  
c 2+ 1.99  
y 0.5  
z 2.0  
z+1 1.7  
z 2+ 0.58  
z+1 2+ 1.54
